# Supplementary material for: Atmospheric humidity-triggered reversible spin-state switching
Source: Royal Society of Chemistry journal article supplement (doi:10.1039/d2ta08632h), 2022-12-06
Supplement: d2ta08632h1.pdf [file d2ta08632h1.pdf]

**Supporting Information**

**Atmospheric Humidity Triggered Reversible Spin-State  
Switching**

Yang-Hui Luo, \* Hui Dong, Shu-Hua Ma, Feng-Lian Zeng, Xue-Ting Jin, and

Min Liu

School of Chemistry and Chemical Engineering, Southeast University,

Nanjing, 211189, P.R. China. E-mail: [luoyh2016@seu.edu.cn](mailto:luoyh2016@seu.edu.cn)

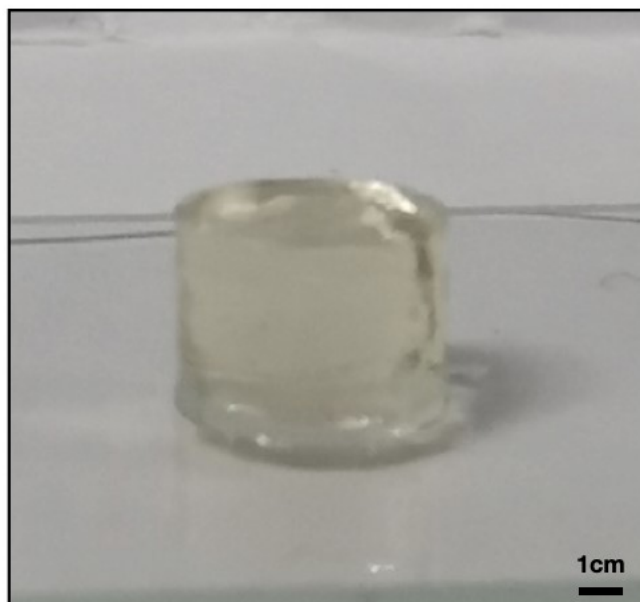

**Figure S1.** Optical image of the naked sponge.

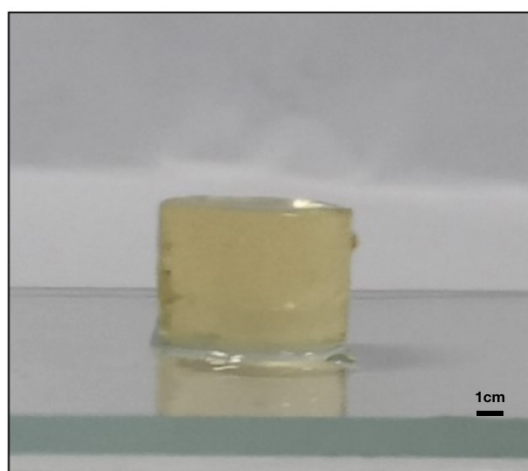

**Figure S2.** Optical image of 2D-SCO in the sponge

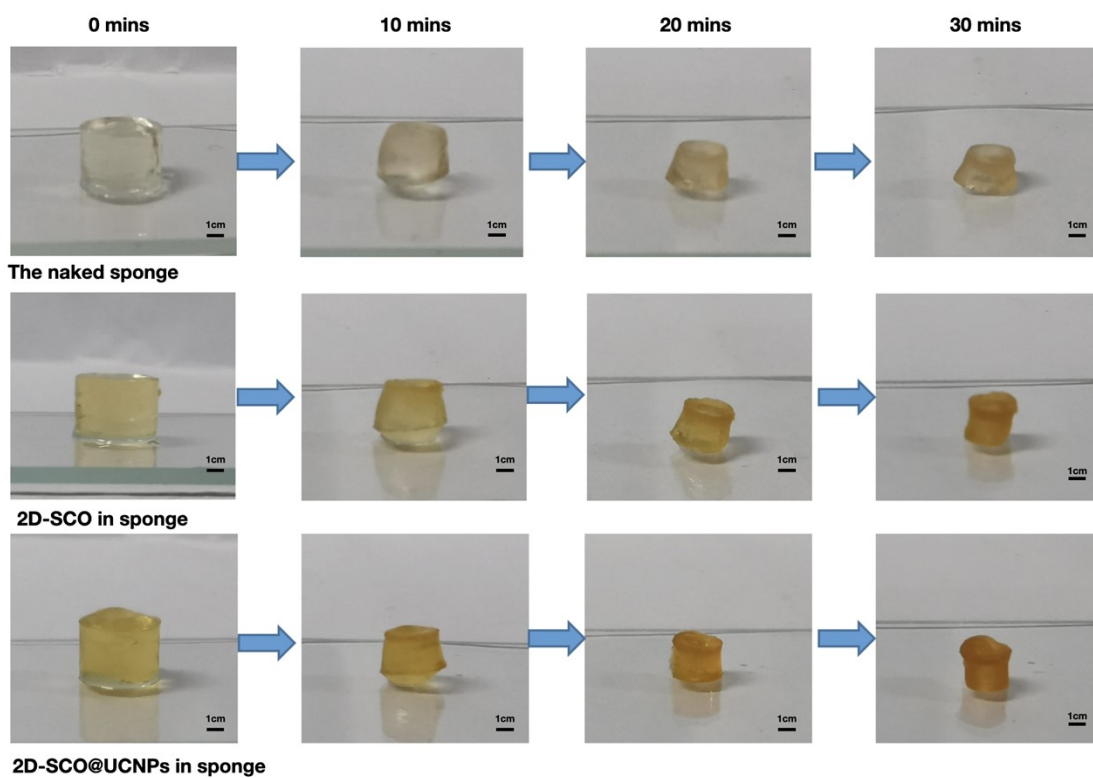

**Figure S3.** Photo images of sponges upon heating under 45 °C for 30 mins

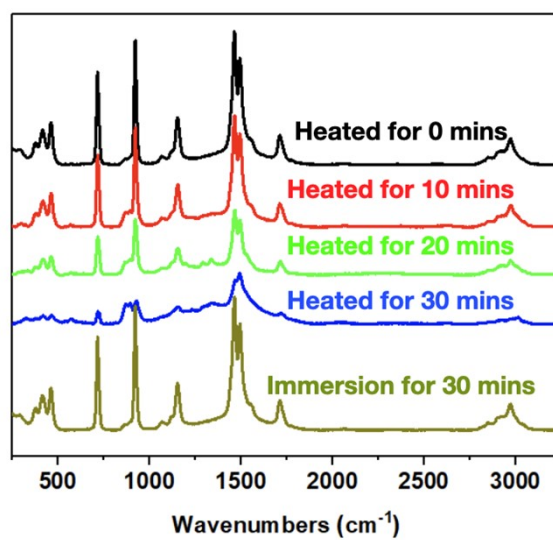

**Figure S4.** Raman spectra illustrate the shrinking and restoration of 2D-SCO in the sponge.

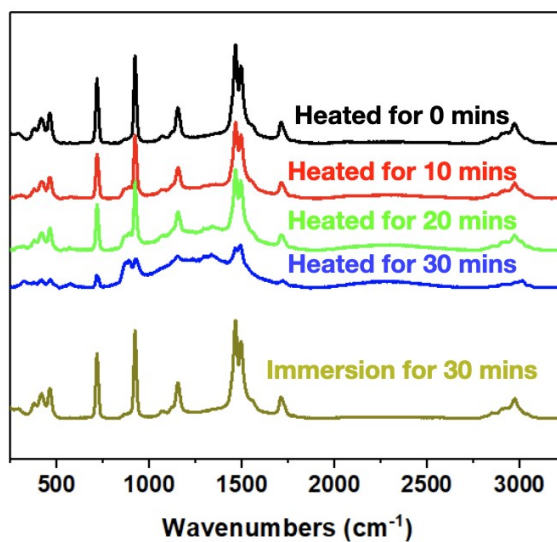

**Figure S5.** Raman spectra illustrate the shrinking and restoration of 2D-SCO@UCNPs in the sponge.

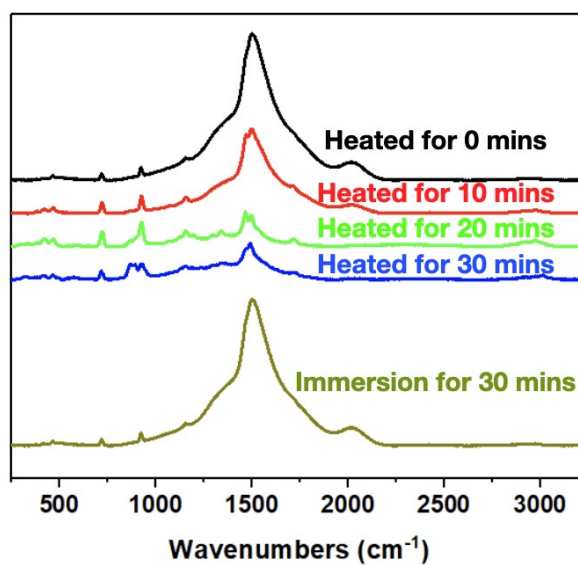

**Figure S6.** Raman spectra illustrate the shrinking and restoration of 2D-SCO@UCNPs in the sponge.

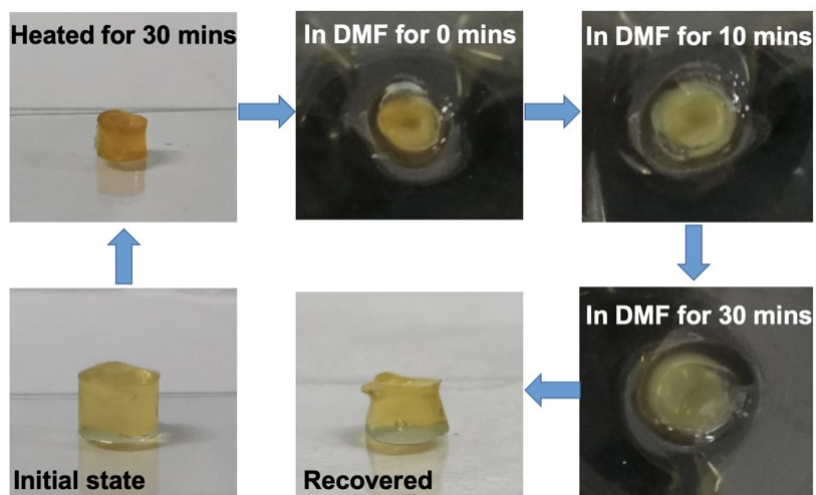

**Figure S7.** Recovery of 2D-SCO@UCNPs in the sponge upon DMF immersion.

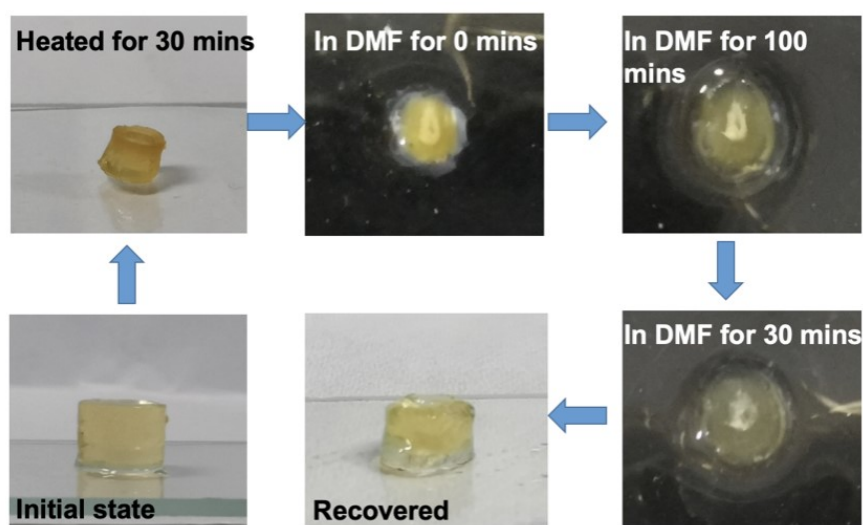

**Figure S8.** Recovery of 2D-SCO in the sponge upon DMF immersion.
